# Supplementary material for: Systematic Expression Profiling Analysis Identifies Specific MicroRNA-Gene Interactions that May Differentiate between Active and Latent Tuberculosis Infection
Source: Hindawi journal article supplement (doi:10.1155/2014/895179), 2014-01-01
Supplement: f1 [file 895179.f1.pdf]

Supplementary Tables

Table S1. Differentially expressed blood-and lung-targeting microRNAs and their target genes in active TB versus healthy control (absolute fold change $\geq$ 1, FDR<0.05)

| <b>microRNA</b> | <b>Fold change</b> | <b>Target gene</b> | <b>Fold change</b> |
|-----------------|--------------------|--------------------|--------------------|
| hsa-let-7i-5p   | -1.022620499       | ADM                | 1.991955549        |
|                 |                    | HMGA2              | 1.083876589        |
|                 |                    | LRRK2              | 1.088987946        |
|                 |                    | SERPING1           | 1.921185639        |
|                 |                    | TLR4               | 1.109764875        |

Table S2. Differentially expressed blood-and lung-targeting microRNAs and their target genes in LTBI versus healthy control (absolute fold change $\geq$ 1, FDR<0.05)

| <b>microRNA</b> | <b>Fold change</b> | <b>Target gene</b> | <b>Fold change</b> |
|-----------------|--------------------|--------------------|--------------------|
| hsa-miR-107     | 1.087456866        | BTG2               | -1.254837843       |
|                 |                    | EIF5               | -1.283869908       |
| hsa-miR-142-3p  | 1.911618592        | KLF4               | -1.07784215        |
|                 |                    | POMC               | -1.077178173       |
|                 |                    | JUN                | -2.550017008       |
|                 |                    | PMAIP1             | -1.349293986       |
|                 |                    | PDGFRB             | -1.180991308       |
|                 |                    | SIK1               | -1.112539392       |
| hsa-miR-16-5p   | 1.807627123        | SIK1               | -1.112539392       |
|                 |                    | NR4A1              | -2.07041723        |

|               |             |         |              |
|---------------|-------------|---------|--------------|
|               |             | IER2    | -1.007319135 |
|               |             | AGPAT4  | -1.025013485 |
|               |             | CSRNP1  | -3.09693761  |
|               |             | PLEKHG2 | -1.040483174 |
|               |             | CD69    | -2.02909225  |
| hsa-miR-21-5p | 1.700265107 | CD69    | -2.02909225  |
|               |             | H3F3B   | -1.132305713 |
|               |             | TAF1C   | -1.024709087 |
|               |             | TRIB1   | -1.814667606 |
|               |             | PMAIP1  | -1.349293986 |
| hsa-miR-22-3p | 1.137733536 | H3F3B   | -1.132305713 |
|               |             | TAF1C   | -1.024709087 |
|               |             | TRIB1   | -1.814667606 |
|               |             | PMAIP1  | -1.349293986 |
|               |             | BTG2    | -1.254837843 |

Table S2 continued.

| <b>microRNA</b> | <b>Fold change</b> | <b>Target gene</b> | <b>Fold change</b> |
|-----------------|--------------------|--------------------|--------------------|
| hsa-miR-221-3p  | 1.266766297        | FOS                | -1.773572786       |
|                 |                    | ZBTB24             | -1.78372674        |
|                 |                    | EIF1               | -1.122163642       |
|                 |                    | MYLIP              | -1.470759651       |
|                 |                    | NAP1L5             | -1.027799939       |

|                |             |       |              |
|----------------|-------------|-------|--------------|
|                |             | SOCS3 | -1.097718601 |
| hsa-miR-223-3p | 1.344681533 | RHOB  | -1.347201513 |
|                |             | CXCL2 | -3.698947401 |

Table S3. Differentially expressed blood-and lung-targeting microRNAs and their target genes in LTBI versus active TB (absolute fold change $\geq$ 1, FDR<0.05)

| <b>microRNA</b> | <b>Fold change</b> | <b>Target gene</b> | <b>Fold change</b> |
|-----------------|--------------------|--------------------|--------------------|
| hsa-miR-146a-5p | 1.075774362        | ST20               | -1.57107693        |
| hsa-miR-150-5p  | 1.074583994        | CPD                | -1.078308012       |
|                 |                    | ARRB2              | -1.053042331       |
|                 |                    | FFAR2              | -1.584404836       |
|                 |                    | NUP214             | -1.357254667       |
|                 |                    | PNMA3              | -1.096483529       |
|                 |                    | C20orf24           | -1.337640838       |
|                 |                    | C16orf57           | -1.070816645       |
| hsa-miR-16-5p   | 1.396008554        | CPD                | -1.078308012       |
|                 |                    | C15orf39           | -1.216084631       |
|                 |                    | C16orf57           | -1.070816645       |
|                 |                    | TUBA1A             | -1.113928236       |
| hsa-miR-221-3p  | 1.109021           | ANXA1              | -1.042852811       |
|                 |                    | FOS                | -1.274224394       |
|                 |                    | PLAUR              | -1.022310972       |

---

|       |              |
|-------|--------------|
| TIMP2 | -1.169443261 |
|-------|--------------|

|          |              |
|----------|--------------|
| C16orf57 | -1.070816645 |
|----------|--------------|

|      |              |
|------|--------------|
| MIDN | -1.495474526 |
|------|--------------|

---
